# Supplementary material
Source: publisher figshare collection journal article supplement (https://rs.figshare.com/ndownloader/files/13765556)
Supplement: Supplementary file 1 [file 13765556]

**Table S2. Primer sequences used in this study.**

| **Primer name** | **Sequence (5’-3’)** |
| --- | --- |
| **Primers for real time PCR** | |
| *Bxy-daf-12*F-q | CATTACGATTGAGAGTGA |
| *Bxy-daf-12*R-q | TTGCCTACATACAGATTC |
| *Bxy-daf-16*F-q | GCGACAATGGAGACAACAACG |
| *Bxy-daf-16*R-q | GCCGATTCATTCAGCGACGAGA |
| *Bxy-Mn-SOD*F-q | GCCTACTACCGGACTTGTTCCT |
| *Bxy-Mn-SOD*R-q | GCCACCTTCCAGATGCTCTTCA |
| *Bxy-daf-1*F-q | GCCAAACTCAACCTAAAC |
| *Bxy-daf-1*R-q | TCGCATTCCTCAACATTA |
| *Bxy-daf-7*F-q | CTGTTGACATCTCCGTATT |
| *Bxy-daf-7*R-q | GTCGTCGCATATACACAT |
| *Bxy-daf-8*F-q | CAATGTCAGTATATCCAGAA |
| *Bxy-daf-8*R-q | ATCTCCGTTCCTCTTATC |
| *Bxy-daf-9*F-q | GGTAGCAAGTGTGGAGAT |
| *Bxy-daf-9*R-q | ACCTTCACTAACATATCGTC |
| *Bxy-daf-2*F-q | TCTGTTCTTGTTACTCTC |
| *Bxy-daf-2*R-q | TTCTGTTGTTGACTATGT |
| *Bxy-actin*F-q | CAAGAGTACGACGAATCC |
| *Bxy-actin*R-q | AATGTATGACGAAGTAATAA |
| *Bxy-catalase*F-q | CAACTTCCATCCGACTTCGTTC |
| *Bxy-catalase*R-q | CCTCGCCTCCAGTCTCGTATCTT |
| *Bxy-catalase-2*F-q | AGACACATGGATGGATTCGGAAGT |
| *Bxy-catalase-2*R-q | GCCTCCTCAACTGACAGATTCTTG |
| *Bxy-GPX-5*F-q | GCTGATTGTGAATGTCGCCACC |
| *Bxy-GPX-5*R-q | GCAAGGGAACGCCAAGATTGTC |
| *Bxy-GPX-1*F-q | CGTGAACACTGCCAGCCAATG |
| *Bxy-GPX-1*R-q | GCCGTCCTTCTTGTACTTGTCA |
| *Bxy-CYP450-18a1*F-q | CGGTTGTCGCATTCGCTGATT |
| *Bxy-CYP450-18a1*R-q | CGCCTTCCATTCCACTGATTCC |
| *Bxy-CYP450-33c9*F-q | ACAAGTGCTGACAGACCGAGTT |
| *Bxy-CYP450-33c9*R-q | CGTCTTCTCCGTTGGCGTGAA |
| *Bxy-Ec-SOD*F-q | GCAGTTGTTGTCCACGAGAAGG |
| *Bxy-Ec-SOD*R-q | GATACGACGACGACGCCACTT |
| *Bxy-Cu-SOD*F-q | CAACCGAGCCGTCGCTATTCTT |
| *Bxy-Cu-SOD*R-q | TCGACTTGCACTCCTCCGTCTT |
| *Bxy-hexosaminidase*F-q | CACAGCGTCCTCTCCAACATCA |
| *Bxy-hexosaminidase*R-q | CGTCTTCCAGAATCCGACCTCA |
| *Bxy-chitinase*F-q | GCGGCTGCTACTTGACGAACTG |
| *Bxy-chitinase*R-q | ATGCCTTCAAGCCTGCGTAACC |
| *Bxy-chitin synthase*F-q | AACGCCGCTCCGATTATCTTCT |
| *Bxy-chitin synthase*R-q | GCAATCAGCACAGCCAACATCA |
| *Bxy-cellulase1*F-q | TCATTATTCAAGCGACCAACAC |
| *Bxy-cellulase1*R-q | CGAACCATCCGAATCTCCATT |
| *Bxy-cellulase2*F-q | GGACAAGACGAGAGCGGATG |
| *Bxy-cellulase2*R-q | GGTACAGCCATTCAGGTAGC |
| *Bxy-pectate lyase*1F-q | GCTCTATCGTTCTTGCGGAAA |
| *Bxy-pectate lyase*1R-q | CCTGGTGGTTGTTGTTGGTT |
| *Bxy-pectate lyase*2F-q | AGCCTCAGACAAGTACAACATC |
| *Bxy-pectate lyase*2R-q | ACGGTGACGCCATCCATAA |
| *Bxy-PDK-1*F-q | CTTCGTCGTCTCGGTTCCTT |
| *Bxy-PDK-1*R-q | CTTGTGATGGTTCGTCTCCTTC |
| **Primers for sequencing** | |
| *Bxy-Mn-SOD*F | CGTGGATGCTCGTCCTCAA |
| *Bxy-Mn-SOD*R | TTAATGCCTGTTGCGGAGATT |
| **Primers for ORF of *Mn-SOD*** | |
| *Bxy-Mn-SOD*-ATG | CGGGATCCATGATGATGAGACAATCTCTT |
| *Bxy-Mn-SOD*-TGA | ACGCGTCGACTCATTCCTTGCTGGCGTTCTGA |
| **primers of *Mn-SOD* DNA templates synthesis for dsRNA** | |
| *Bxy-Mn-SOD*-152 | CCACCTATGTGAACAACCTA |
| *Bxy-Mn-SOD*-603 | CACCTTCCAGATGCTCTTC |
| *Bxy-Mn-SOD*-152-T7 | GGATCCTAATACGACTCACTATAGGCCACCTATGTGAACAACCTA |
| *Bxy-Mn-SOD*-603-T7 | GGATCCTAATACGACTCACTATAGGCACCTTCCAGATGCTCTTC |
| dsGFP-F-T7 | GGATCCTAATACGACTCACTATAGGGGGCAAGCTGACCCTGAAGTT |
| dsGFP-R-T7 | GGATCCTAATACGACTCACTATAGGGGTCCATGCCGAGAGTGATCC |

The T7 promoter sequences were underlined
